# Supplementary material for: The role of salt intake and salt sensitivity in the management of hypertension in South Asian people with chronic kidney disease: a randomised controlled trial
Source: HighWire-hosted journal article supplement (doi:10.1136/heartjnl-2013-303688), 2013-06-13
Supplement: heartjnl-2013-303688supp.pdf [file heartjnl-2013-303688supp.pdf]

## Low-salt program for Bangladeshi CKD patients in East London

| Months                                                | Duration             | Tasks                                                   | Components                                                                                                                                                                                                                                                                        |
|-------------------------------------------------------|----------------------|---------------------------------------------------------|-----------------------------------------------------------------------------------------------------------------------------------------------------------------------------------------------------------------------------------------------------------------------------------|
| 1 <sup>st</sup>                                       | 1 hour               | Initial session with researcher and Bengali key worker  | 24hrs urine bottle given and collecting method explained<br>Ambulatory blood pressure (BP) monitor attached for 24hrs<br>Following day – participant return 24h bottle and BP monitor                                                                                             |
| 1 <sup>st</sup><br>(2 weeks later)                    | 1 & 1/2h<br>to<br>2h |                                                         | Participant and family members<br>Key worker to facilitate session; if non-English speaker<br>Participants shown and given results of 24h urinary sodium and 24h BP measurement<br>Session based on written low-salt tailored advice<br>Salt reducing goals set with participants |
| 2 <sup>nd</sup>                                       | 3hrs each session    |                                                         | Participants, or cooking family member to attend<br>Two weekly consecutive sessions                                                                                                                                                                                               |
| 3 <sup>rd</sup><br>4 <sup>th</sup><br>5 <sup>th</sup> | 10-15 mins each call | Fortnightly telephone calls to reinforce health message | Same Bengali key worker facilitating CKUK sessions ring patients every two weeks<br>Phone calls to reinforce dietary advice discussed in sessions<br>Phone calls to review and discuss participants' goals                                                                        |
| 6 <sup>th</sup>                                       | 1 & 1/2h to 2h       | Final dietetic session with researcher                  | Participants shown final results of 24h sodium and BP results<br>Goals and achievement reviewed<br>Discuss reinforcement and follow up by renal dietitians in the Trust                                                                                                           |

## Framework for introductory dietetic session facilitated by Bangladeshi key worker

---

| <b>Session framework</b> |                                                                                                                                                                                                                                                                                                                                        |
|--------------------------|----------------------------------------------------------------------------------------------------------------------------------------------------------------------------------------------------------------------------------------------------------------------------------------------------------------------------------------|
| Introduction             | Session conducted at a hospital meeting room/ All seated around a large oval table<br>Tea / coffee / water / squash and plain biscuits available<br>Bengali key worker introduces herself and researcher<br>Participants and family members are introduced/ Session formatting explained                                               |
| Measuring salt           | A range of regular utensils used by Bangladeshi community to add salt to cooking presented<br>Participant or cooking family member asked to;<br>choose their regular utensil for salt,<br>measure their customary amount salt usually added to cooking & estimate weight of salt<br>weigh this amount of salt that is added to cooking |
| Salt intake              | Salt intake discussed as;<br>amount salt added to cooking/ estimated salt intake from meals/ salt present in foods<br>results of 24hrs urinary sodium test given<br>Ways to reduce dietary salt intake from tailored low-salt information sheet discussed                                                                              |
| Blood pressure measures  | Results 24hrs ambulatory blood pressure given and explained to participants<br>Benefits of blood pressure decrease, mainly in kidney and heart disease, discussed<br>Effect of salt reduction on blood pressure discussed                                                                                                              |
| <i>Goal setting</i>      | Goal setting by participants for gradual reduction of salt added to cooking                                                                                                                                                                                                                                                            |

---

## Framework for community kitchen cooking sessions

---

| <b>CKUK session framework</b> |                                                                                                                                                                                                                                            |
|-------------------------------|--------------------------------------------------------------------------------------------------------------------------------------------------------------------------------------------------------------------------------------------|
| Introduction                  | Facilitator introduces herself and researcher<br>House safety are explained<br>Session formatting explained                                                                                                                                |
| Cooking                       | Participants are split into groups of 2-3<br>Participants are given recipes and ingredients<br>Each group to cook 1-2 dishes with ½ recipe salt; added extra coriander and chillies<br>One group to cook same dishes with full amount salt |
| During cooking                | Participants are asked to weigh their usual amount of added salt at home cooking<br>Salt added to cooking & consequences of high salt intake is discussed<br>Target reductions set by participants                                         |
| End of session                | Participants to blind taste dishes with reduced and normal amount salt<br>Taste differences discussed<br>Participants to take portions to family to try                                                                                    |
| Plan following session        | Recipes discussed for following week<br>Participant appointed to buy ingredients<br>Money for ingredients provided by researcher                                                                                                           |
| <i>Last session</i>           | At the end of 2 <sup>nd</sup> and last session – evaluation discussion by participants                                                                                                                                                     |

---
